# Supplementary material
Source: PubMed Central journal article supplement (PMC2364863)
Supplement: bmj_39532.543947.BE_1.pdf [file bmj_39532.543947.BE_1.pdf]

## Web references for included studies

1. Al RA, Baykal C, Karacay O, Geyik PO, Altun S, Dolen I. Random urine protein-creatinine ratio to predict proteinuria in new-onset mild hypertension in late pregnancy. *Obstet Gynecol.* 2004;104:367-71.
2. Durnwald C, Mercer B. A prospective comparison of total protein/creatinine ratio versus 24-hour urine protein in women with suspected preeclampsia. *Am.J Obstet Gynecol.* 2003;189:848-52.
3. Jaschevatzky OE, Rosenberg RP, Shalit A, Zonder HB, Grunstein S. Protein/creatinine ratio in random urine specimens for quantitation of proteinuria in preeclampsia. *Obstet Gynecol.* 1990;75:604-6.
4. Neithardt AB, Dooley SL, Borensztajn J. Prediction of 24-hour protein excretion in pregnancy with a single voided urine protein-to-creatinine ratio. *Am.J Obstet Gynecol.* 2002;186:883-6.
5. Ramos JG, Martins-Costa SH, Mathias MM, Guerin YL, Barros EG. Urinary protein/creatinine ratio in hypertensive pregnant women. *Hypertens Pregnancy* 1999;18:209-18.
6. Robert M, Sepandj F, Liston RM, Dooley KC. Random protein-creatinine ratio for the quantitation of proteinuria in pregnancy. *Obstet Gynecol.* 1997;90:893-5.
7. Rodriguez-Thompson D, Lieberman ES. Use of a random urinary protein-to-creatinine ratio for the diagnosis of significant proteinuria during pregnancy. *Am.J Obstet Gynecol.* 2001;185:808-11.
8. Saudan PJ, Brown MA, Farrell T, Shaw L. Improved methods of assessing proteinuria in hypertensive pregnancy. *Br.J Obstet Gynaecol.* 1997;104:1159-64.
9. Taherian AA, Dehbashi S, Baghban M. The relationship between random urinary protein-to-creatinine ratio and 24-hours urine protein in diagnosis of proteinuria in mild preeclampsia. *JRMS* 2006;11:6-12.
10. Valerio EG, Ramos JG, Martins-Costa SH, Muller AL. Variation in the urinary protein/creatinine ratio at four different periods of the day in hypertensive pregnant women. *Hypertens Pregnancy* 2005;24:213-21.
11. Wheeler TL, Blackhurst DW, Dellinger EH, Ramsey PS. Usage of spot urine protein to creatinine ratios in the evaluation of preeclampsia. *Am J Obstet Gynecol.* 2007;196:465-4.
12. Yamasmit W, Wongkitisophon K, Charoenvidhya D, Uerpairojkit B, Chaithongwongwatthana S. Correlation between random urinary protein-to-creatinine ratio and quantitation of 24-hour proteinuria in preeclampsia. *J Med.Assoc.Thai.* 2003;86:69-73.
13. Young RA, Buchanan RJ, Kinch RA. Use of the protein/creatinine ratio of a single voided urine specimen in the evaluation of suspected pregnancy-induced hypertension. *J Fam.Pract.* 1996;42:385-9.
14. Nisell H, Trygg M, Back R. Urine albumin/creatinine ratio for the assessment of albuminuria in pregnancy hypertension. *Acta Obstet Gynecol.Scand* 2006;85:1327-30.

15. Waugh J, Bell SC, Kilby MD, Lambert P, Shennan A, Halligan A. Urine protein estimation in hypertensive pregnancy: which thresholds and laboratory assay best predict clinical outcome? *Hypertens Pregnancy* 2005;24:291-302.
